# Supplementary material for: Identification and Validation of Reference Genes in Clostridium beijerinckii NRRL B-598 for RT-qPCR Using RNA-Seq Data
Source: Front Microbiol. 2021 Mar 18;12:640054. doi: 10.3389/fmicb.2021.640054 (PMC8012504; doi:10.3389/fmicb.2021.640054)
Supplement: Supplementary file 2 [file Table_2.XLSX]

## Sheet: Candidate reference genes
Supplementary Material 2. Additional data for selection of candidate reference genes according to RNA-Seq data analysis
List of candidate reference genes
	Unique reads			Multi-mapping reads
Locus Tag	insignificant changes	mean TPM	CV TPM (%)	insignificant changes	mean TPM	CV TPM (%)
X276_26600	55	420.82	29.08	58	401.64	29.74
X276_26510	62	63.83	29.67	62	63.65	28.70
X276_26495	58	51.73	23.62	58	48.80	24.09
X276_26380	60	100.41	26.72	61	100.41	27.26
X276_26350	54	63.65	29.82	53	58.38	29.79
X276_26345	54	44.88	25.93	54	44.39	25.73
X276_26290	65	592.75	23.50	66	665.71	20.82
X276_26250	58	365.64	29.18	56	445.24	26.45
X276_26205	51	407.44	22.70	54	356.72	22.64
X276_25940	61	529.32	25.13	60	523.20	24.87
X276_25935	52	659.17	22.78	50	652.88	22.84
X276_25735	59	66.14	20.34	59	64.92	20.91
X276_25660	59	81.47	27.99	59	77.73	28.82
X276_25655	55	140.04	23.44	55	137.36	23.97
X276_25620	51	77.52	23.69	51	77.03	24.10
X276_25205	50	1097.87	26.20	57	1932.97	29.20
X276_25185	65	61.22	27.87	65	61.12	28.13
X276_24820	53	122.12	18.74	53	120.42	19.03
X276_24815	52	124.29	19.74	52	122.41	19.69
X276_24660	64	50.92	27.48	64	50.85	27.47
X276_24325	66	118.19	27.63	66	113.32	27.36
X276_24320	60	83.77	27.39	60	79.02	27.27
X276_24295	59	161.82	22.01	59	161.35	21.57
X276_24180	66	105.94	25.62	66	105.16	24.77
X276_24125	55	36.90	27.17	55	35.88	27.04
X276_24120	55	42.25	26.24	51	39.74	26.13
X276_23800	55	156.10	23.24	55	155.49	23.61
X276_23760	50	54.96	23.19	50	53.78	22.98
X276_23615	58	266.16	25.41	59	266.06	25.93
X276_23520	51	53.10	29.15	51	52.99	28.84
X276_23390	55	56.73	27.42	56	50.08	28.60
X276_23130	60	56.97	23.73	59	56.78	23.14
X276_23005	54	57.03	25.73	50	56.37	25.57
X276_22705	54	103.31	24.93	53	101.31	25.03
X276_22530	50	3144.58	23.27	53	2951.08	24.31
X276_22485	57	216.23	19.95	56	209.04	20.13
X276_22110	53	95.19	20.48	53	93.69	20.69
X276_22105	56	74.84	19.16	55	74.68	19.21
X276_21855	50	713.29	24.96	50	711.32	24.73
X276_21635	55	49.43	27.56	53	49.35	27.33
X276_20945	55	71.24	28.37	55	70.97	27.83
X276_20800	51	327.04	20.14	51	313.24	20.39
X276_20795	65	302.03	19.25	66	276.04	20.38
X276_20790	60	280.77	18.66	60	269.36	18.84
X276_20770	55	55.29	23.39	53	49.49	22.76
X276_20645	63	277.57	25.38	63	266.45	25.34
X276_20570	66	221.25	24.20	66	220.73	23.94
X276_20565	55	300.80	23.36	53	299.86	23.26
X276_20535	51	64.59	23.38	51	64.54	23.90
X276_20450	55	180.46	21.88	55	176.30	22.22
X276_20445	60	250.79	28.65	60	241.29	28.95
X276_20320	61	68.96	22.45	61	67.31	22.53
X276_20165	63	48.50	26.07	62	48.08	26.37
X276_20135	66	174.44	29.04	66	167.91	29.42
X276_20125	56	113.96	17.24	55	113.66	17.36
X276_19900	58	64.90	29.65	58	61.14	29.73
X276_19890	57	69.21	26.88	57	66.08	26.92
X276_19860	66	820.85	17.35	66	785.95	17.30
X276_19855	56	1165.44	21.60	53	1145.71	21.03
X276_19755	58	74.61	21.21	58	71.17	21.57
X276_19750	61	43.90	22.91	61	41.80	23.47
X276_19640	66	91.04	25.81	65	88.25	24.72
X276_19435	60	41.42	26.82	60	40.71	27.16
X276_19425	51	63.12	28.30	51	63.07	28.81
X276_19310	64	39.27	26.93	64	39.15	26.34
X276_19295	52	56.57	19.12	52	56.92	19.35
X276_19240	59	114.86	24.72	57	114.39	23.94
X276_18995	52	45.06	27.00	51	44.93	27.01
X276_18940	52	88.45	22.84	52	79.53	23.19
X276_18880	57	47.48	18.57	55	47.36	18.75
X276_18840	62	258.13	28.70	61	257.29	28.46
X276_18785	55	71.53	29.48	55	71.34	29.16
X276_18390	65	48.51	28.16	65	47.06	28.24
X276_18345	59	82.85	15.50	57	82.64	15.66
X276_18225	57	117.77	28.23	58	117.70	28.83
X276_18115	55	76.45	25.97	52	76.29	25.82
X276_18095	51	126.34	29.29	51	126.35	29.84
X276_18050	64	414.87	29.22	64	394.78	29.17
X276_17750	59	45.99	29.81	58	45.85	29.63
X276_17540	50	46.48	24.91	54	46.34	25.24
X276_17255	55	64.61	28.99	55	62.41	28.74
X276_17250	51	66.10	26.25	50	64.26	26.04
X276_15620	52	55.18	28.50	52	54.97	28.45
X276_15295	54	84.80	29.91	51	84.47	29.57
X276_15045	63	54.36	20.82	63	53.99	21.40
X276_14645	54	220.32	20.06	51	219.09	19.70
X276_14635	66	172.93	23.85	66	172.39	22.96
X276_14570	56	48.94	21.50	53	48.79	21.45
X276_14355	57	132.10	27.66	53	131.67	27.07
X276_14315	55	72.63	25.65	55	72.65	26.08
X276_13935	54	364.52	29.94	53	362.09	29.40
X276_27555	61	54.10	25.90	61	53.97	26.39
X276_13030	56	52.19	18.30	54	52.02	18.09
X276_12970	60	84.37	28.80	61	84.17	29.07
X276_12410	66	87.21	28.96	62	92.50	26.66
X276_10975	64	59.23	24.15	60	58.31	23.27
X276_10970	62	52.53	27.58	59	52.33	27.33
X276_10830	54	62.31	29.78	53	62.03	29.32
X276_09945	54	62.86	26.04	51	62.74	26.33
X276_09555	59	35.61	29.88	59	35.48	29.41
X276_09280	63	125.44	20.42	63	124.95	19.62
X276_09260	55	49.32	27.76	56	46.78	27.28
X276_09255	60	46.17	28.04	60	44.35	28.05
X276_09035	56	53.21	25.79	54	53.05	25.44
X276_08600	60	49.94	26.74	60	48.55	26.91
X276_08545	57	43.60	23.84	57	43.50	24.17
X276_08130	60	55.83	29.26	60	55.58	28.74
X276_07990	65	67.36	26.79	64	67.11	25.87
X276_07830	56	41.90	18.30	56	41.88	18.14
X276_07770	50	72.58	25.21	50	72.46	25.33
X276_07600	51	55.10	27.15	50	54.94	27.24
X276_07435	60	188.66	29.14	60	179.82	29.34
X276_07155	63	55.50	20.19	60	55.33	19.93
X276_06775	50	58.00	29.78	50	57.80	29.30
X276_06715	52	59.29	28.54	53	59.22	29.08
X276_05660	54	57.26	27.22	54	57.09	27.42
X276_05400	59	48.50	28.87	61	48.43	29.23
X276_04570	56	36.44	22.14	56	36.35	22.24
X276_04450	62	67.69	19.99	62	67.54	20.28
X276_03970	53	198.48	27.63	54	198.44	28.06
X276_03960	52	46.75	29.36	52	46.61	28.95
X276_03780	54	41.77	17.14	52	41.64	16.65
X276_27355	64	36.63	24.53	64	36.60	24.79
X276_03625	54	198.13	28.65	53	197.47	28.12
X276_03610	56	249.50	26.84	55	241.91	26.62
X276_03335	59	141.69	19.78	58	141.22	19.52
X276_03195	56	125.34	29.71	56	125.12	29.94
X276_03190	53	37.93	23.67	55	37.18	23.87
X276_02910	51	60.12	24.15	52	59.41	24.58
X276_02810	55	88.68	23.46	54	88.45	23.37
X276_02745	51	117.41	22.62	51	117.27	23.13
X276_02740	50	61.25	21.69	51	61.20	22.36
X276_02710	58	39.56	29.13	57	39.40	28.33
X276_02110	62	177.82	29.39	61	177.19	28.61
X276_02000	56	177.94	25.66	57	177.84	26.14
X276_01995	66	168.17	28.99	66	167.00	29.45
X276_01880	51	47.18	19.55	51	47.08	19.65
X276_01745	63	91.59	22.27	63	91.38	22.03
X276_01360	63	176.61	26.86	63	163.88	27.48
X276_01355	58	86.99	17.75	56	82.24	17.92
X276_01350	64	80.32	15.91	63	77.16	16.15
X276_01325	55	87.66	19.67	55	85.05	19.57
X276_01305	56	51.81	19.54	55	49.28	19.53
X276_01300	55	184.00	19.11	55	180.91	19.44
X276_00760	64	49.42	24.11	64	49.25	23.74
X276_00755	53	36.41	27.69	53	36.47	28.18
X276_00750	66	58.49	24.77	66	58.30	24.09
X276_00470	62	67.76	21.01	62	67.56	20.82
X276_00245	61	70.58	25.11	62	68.71	25.65
X276_00175	56	75.04	20.24	57	74.94	20.81
X276_00130	55	264.24	29.74	55	258.83	29.51
X276_00120	50	190.20	25.72	52	184.28	25.83
X276_00115	55	245.31	27.07	54	239.25	27.21
X276_00075	58	59.10	21.17	58	58.24	21.17
X276_00020	61	440.41	22.04	61	417.47	22.59
X276_00015	62	395.55	23.46	64	289.51	26.20
X276_00010	54	272.13	28.20	56	231.28	28.00
X276_12505	63	102.67	25.11	55	107.66	21.49
X276_27730	61	105.78	29.50	62	105.66	29.22
X276_27740	58	59.25	20.39	58	59.26	20.66

## Sheet: Homologies
Supplementary Material 2. Additional data for selection of candidate reference genes according to RNA-Seq data analysis
Sequence similarities between C. beijerinckii NRRL B-598 and NCIMB 8052 candidate reference genes (Wang et al., 2011)
NRRL B-598	NCIMB 8052	sequence similarity (%)
X276_25655	Cbei_0201	97.30
X276_24180	Cbei_0494	99.55
X276_23615	Cbei_0634	99.79
X276_23005	Cbei_0752	99.76
X276_20570	Cbei_1190	99.86
X276_20450	Cbei_1214	99.64
X276_19860	Cbei_1327	99.50
X276_18115	Cbei_1784	100.00
X276_14635	Cbei_2405	99.54
X276_14315	Cbei_2469	96.98
X276_10970	Cbei_3082	96.89
X276_07830	Cbei_3650	100.00
X276_04450	Cbei_4223	97.07
X276_02810	Cbei_4602	99.37
X276_01350	Cbei_4856	99.26
X276_01325	Cbei_4861	99.92
Reference gene used for C. beijerinckii NCIMB 8052 (Wang et al., 2012) and its homologue in C. beijerinckii NRRL B-598
					Unique reads			Multi-mapping reads
NRRL B-598	NCIMB 8052	sequence similarity (%)	Locus Tag	Abbr.	insignificant changes	mean TPM	CV TPM (%)	insignificant changes	mean TPM	CV TPM (%)
X276_14515	Cbei_2428	99.00	X276_14515	pepT	41	171.32	29.25	41	170.91	29.29

## Sheet: Final selection
Supplementary Material 2. Additional data for selection of candidate reference genes according to RNA-Seq data analysis
Final selection of candidate reference genes
			Unique reads			Multimapping reads
Abbr.	Gene annotation	Locus Tag	insignificant changes	mean TPM	CV TPM (%)	insignificant changes	mean TPM	CV TPM (%)
greA	transcription elongation factor GreA	X276_26205	51	407.44	22.70	54	356.72	22.64
rpoB1	DNA-directed RNA polymerase subunit beta	X276_25940	61	529.32	25.13	60	523.20	24.87
rpoB2	DNA-directed RNA polymerase subunit beta'	X276_25935	52	659.17	22.78	50	652.88	22.84
zmp	zinc metallopeptidase	X276_20795	65	302.03	19.25	66	276.04	20.38
rsmB	16S rRNA (cytosine(967)-C(5))-methyltransferase RsmB	X276_20790	60	280.77	18.66	60	269.36	18.84
rimO	30S ribosomal protein S12 methylthiotransferase RimO	X276_20450	55	180.46	21.88	55	176.30	22.22
topB2	type IIA DNA topoisomerase subunit B	X276_03960	52	46.75	29.36	52	46.61	28.95
